# Supplementary material
Source: publisher site journal article supplement (https://www.dovepress.com/article/374636)
Supplement: Supplementary file 1 [file get_supplementary_file.php]

**Supplementary Table 1. International Study of PV Score**

| Parameter | Points | Risk category |
| --- | --- | --- |
| Age >66 years | 5 | - Low risk (0 points) - Intermediate-risk (1-2 points) - High-risk (≥3 points) |
| Age 57-66 years | 2 |
| WBC ≥15x109/L | 1 |
| Venous thrombosis | 1 |

**Supplementary Table 2. IPSET-Thrombosis Score for ET**

| Parameter | Points | Risk category |
| --- | --- | --- |
| Age ≥60 years | 1 | - Low risk (<2 points) - Intermediate-risk (2 points) - High-risk (>2 points) |
| Previous thrombosis event | 2 |
| Cardiovascular risk* ≥1 | 1 |
| JAK2V617 mutation | 2 |

*Hypertension, diabetes, and/or tobacco smoking

**Supplementary Table 3. IPSS and DIPSS for PMF**

| Parameter | Points | | Risk category | |
| --- | --- | --- | --- | --- |
| IPSS | DIPSS | IPSS | DIPSS |
| Age >65 years | 1 | 1 | - Low risk (0 points) - Intermediate-1 risk (1 points) - Intermediate-2 risk (2 points) - High-risk (3-5 points) | - Low risk (0 points) - Intermediate-1 risk (1-2 points) - Intermediate-2 risk (3-4 points) - High risk (5-6 points) |
| Constitutional symptoms* | 1 | 1 |
| Haemoglobin <10 g/ dL | 1 | 2 |
| WBC >25x109/L | 1 | 1 |
| Circulating blast ≥1% | 1 | 1 |

*Fever, fatigue, and/or weight loss
